# Supplementary material for: Phage tRNAs evade tRNA-targeting host defenses through anticodon loop mutations
Source: eLife. 2023 Jun 2;12:e85183. doi: 10.7554/eLife.85183 (PMC10264068; doi:10.7554/eLife.85183)
Supplement: Supplementary file 1. — (a) Overview of all C1 mycobacteriophage encoded tRNAs. (b) Overview of anticodons encoded by C1 mycobacteriophages compared to their hosts'. (c) Analysis of anticodon loop mutations and anticodon avoidance in other species. [file elife-85183-supp1.xlsx]

## Sheet: Supplementary File 1a
Supplementary File 1a. Overview of all C1 mycobacteriophage encoded tRNAs
#	phage tRNA prevalence			Manual	Aragorn		tRNAscan-SE
Sequence_ID	Sequence	Abundance (count)	Abundance (%)	Anticodon loop of the phage compared to host	tRNA Type	tRNA anticodon	tRNA Type	tRNA anticodon	Infernal score	Isotype model	Isotype Score	Note
1	gcctctgtagctcaacggacagagcaacgcggtcctaacgcggtggctggaggttcgaatcctctcggaggcac	148	91.9255	mutations	Arg	cct	Arg	CCT	59.8	Arg	66.1
2	gcctgttagcggactggtcgtccgatccaagctgataacttggcgtaagcggtgttcgattcaccgagcaggtac	148	91.9255	NA	Ile	gat	NA	NA	NA	NA	NA
3	gcctcactagctcattggtagagccgctcgctcataacgtgcaggtacctggttcgattccagggtgaggtac	147	91.3043	mutations	Met	cat	Ile2	CAT	50.9	Lys	65	IPD:-1.80
4	gcgcctttggcggaatggctacgtgctcggctgcaacccgagttatcccggttcgactccgggagggcgctc	147	91.3043	mutations	Cys	gca	Cys	GCA	54	Cys	67.8
5	gcgggtgtggccgaatggctcaggcaccagatttccactctggctacgcaggttcgattcctgtcatccgctc	145	90.0621	mutations	Gly	tcc	Gly	TCC	63.4	Cys	68.3	IPD:-19.70
6	gtccgtgtagctcaggggtagagcgcctgctcgacacgcaggaggaccgaggttcgaaacctcgcatggacac	144	89.441	mutations	Val	gac	Val	GAC	58.9	Thr	71.2	IPD:-8.80
7	gtccgtttagctcagctggaagagcgctcggtccacacccgagaggccgcaggttcgatccctgcaatggacac	142	88.1988	mutations	Val	cac	Val	CAC	61.3	Ile	74.7	IPD:-0.80
8	tggggtatggtggcaatctggcagtcccgccggactttgactccggaggtgcaggttcgagtcctgctaccccatc	142	88.1988	mutations	Gln	ttg	Gln	TTG	56.5	Gln	66.5
9	ggtcgggtcggtctgctggtatggccagtcggattttcactccggacattcgcgggttcaattcccgtcccgatcgc	138	85.7143	mutations	Glu	ttc	Glu	TTC	46.1	Cys	36.9	IPD:-2.20
10	gcctctatggtccaacggatatgacgccggtctacggaaccggagatgcgtgttcgattcgcgctaggggcac	137	85.0932	mutations	Arg	acg	Arg	ACG	54.2	Arg	52.3
11	ggccctgtagctcagaggaagagcgccggtctgtcgaatcggaggtcgcggtatcgtaatccgtcagggtcgc	133	82.6087	mutations	Asp	gtc	Asp	GTC	46.5	Ile2	43.7	IPD:-21.70
12	gcctctgtggtccagcggcacggacatccgccttgtaagcggaggacccccgttcgatccggggtagaggctc	131	81.3665	no	Thr	tgt	Thr	TGT	54.9	Cys	55.8	IPD:-9.50
13	gccgtggtaggccatctggcgagccgccgagttcaagtttcggtgtttgcgggttcgaatcccgcccacggtac	130	80.7453	loop + mutatations	Leu	caa	Leu	CAA	48.5	Leu	45.4
14	gccgtcatagctcagttggtagagcactggcctgaaaacccagtggccgaggttcgattcctcgtgtcggcac	129	80.1242	loop + mutatations	Phe	gaa	Phe	GAA	70.4	Thr	77.9	IPD:-9.20
15	gggtctgtgcacagggtgcccgacggtctccaaagccgaaggcgggggttcgattccctccaggcctgcca	128	79.5031	NA	Trp	cca	Undet	NNN	37.7	Phe	34.5	pseudo
16	tgctcgttggtgtaactggcaacactacggactctgactccgtcattttaggttcgaatcctaagcgagcagcca	126	78.2609	mutations	Gln	ctg	Gln	CTG	54.9	Gln	69.4
17	gtctctgtaggcaaatcggaaaagccgccatcttgagggggtggtgcgtgcgggttcgactcccgccagagacac	125	77.6398	mutations	Leu	gag	Leu	GAG	50.1	Leu	58.5
18	gggcctgtagctccaattggtagagcagcatccttgcaagatgacggctgtcggttcgaatccgacctggtccac	117	72.6708	mutations	Ala	tgc	Ala	TGC	57.9	Arg	58.8	IPD:-14.50
19	gcgaaggtagctcagctggcagagcgccaccttgccaaggtggaggtcgcgggatcgtaacccgttcttcgctc	114	70.8075	no	Gly	gcc	Gly	GCC	61.9	Gly	73.3
20	gctgctgtagctcacctggcagagcgtcggcgtcgtatcccgaaggcatccggttcgagtccggacagcagcccc	113	70.1863	loop + mutatations	Thr	cgt	Thr	CGT	52.1	Thr	67.1
21	gtggccgtagttcagccggtagaacgctgggttgtgatcccagtcgtcgagggttcgagtccctccggtcaccc	110	68.323	no	His	gtg	His	GTG	64	His	90.5
22	tggggtgtccgttaatcaggcaaacgagcggactgttaatccgcccctgcaggttcgaatcctgccaccccagcca	107	66.4596	mutations	Asn	gtt	Asn	GTT	64.4	Gln	68.8	IPD:-71.40
23	gccttcgtagctcagtggtagagctgtcgcctcttaagcgataggtcgttggttcgaatccagccgggggcac	106	65.8385	mutations	Lys	ctt	Lys	CTT	69.9	Asn	83.4	IPD:-12.20
24	gcccttgtagctcagtggacagagcggcgagcttctacctcgcgggccgggagttcgaatctctccaggggcacca	106	65.8385	loop + mutation	Arg	tct	Arg	TCT	73	Arg	83.8
25	gctgggttagctcagtggtagagcgttcctctggtatgggaaaggcccggggttcaatcccccgactcagctc	93	57.764	mutations	Thr	ggt	Thr	GGT	57.8	Val	67.9	IPD:-4.80
26	attctggcactggtgggcgagcccaccggcggcagcttcaagctgtcgctggccggagaaccgaccggaaacatcccgttcaacgcgacccagggcc	92	57.1429	NA	SeC	tca	SeC	SeC	NA	NA	NA
27	tgcgagatcgtgcacggcgcactaggagcttctaaccctccgactcgcgggttcgactcccgcatctcgcaccc	77	47.8261	NA	Pyl	cta	Sup	CTA	27.6	Trp	17.4	IPD:-17.40
28	ggtccgttggagtagatggatatctcgccaccctctcaaggtggagatcacgggttcaagtcccgtacggactgc	76	47.205	mutations	Glu	ctc	Glu	CTC	59.5	Asp	67.5	IPD:-4.10
29	cggggtgtagttcagtttggaagagcgcttggtttgggaccaagatgtcgcaggttcgaatcctgtcaccccgac	75	46.5839	mutations	Pro	tgg	Pro	TGG	69.4	Pro	92.1
30	agcggtgtagagcagctaggtagctcgccgggctcataacccggaggacgcgtgttcgaatcacgccaccgccac	74	45.9627	mutations	Met	cat	fMet	CAT	71.7	fMet	81.9
31	gccctgctgagcaaactggcaaagctgccgcattcagagtgcgggtcatttccgggttcgactcccgggcagggtac	70	43.4783	mutations	Leu	cag	Leu	CAG	45.5	Leu	53.9	pseudo
32	gctcccgtagcccaattggcaggaggcaccagattcaggatctgggcagtgtgagttcgaatctcaccgggagtac	58	36.0248	mutations	Leu	cag	Leu	CAG	59	Leu	65.3
33	cggggtgtagttcagtttggaagagcgcttggtttgggaccaagttgtcgcaggttcgaatcctgtcaccccgac	58	36.0248	mutations	Pro	tgg	Pro	TGG	68.9	Pro	91
34	gcaccatttgctcaatggcagagcggcggcttctaaaaccgtgagtgccggttcgactccggcatggtgcacc	51	31.677	NA	Pyl	cta	Sup	CTA	65.5	Phe	63.1	IPD:-63.10
35	agcggtgtagagcagctaggtagctcgccgggctcatgacccggaggacgcgtgttcgattcacgccaccgccac	50	31.0559	mutations	Met	cat	Met	CAT	67.7	Pro	72.6	IPD:-13.30
36	gctcccatggggtagtggtaaccctcctggttctcagccaggcgtcccgagttcgatcctcggtgggagtgc	46	28.5714	mutations	Glu	ctc	Glu	CTC	50	Gln	59.1	IPD:-3.80
37	cccgtacatgcccaactggtgtttgggagcaggctgtaaatctgtggccttcgggacggtgaggttcgattcctcagtgcgggacca	45	27.9503	loop + mutatations	Tyr	gta	Tyr	GTA	30.4	Lys	23.7	IPD:-7.50
38	gcccttgtagctcagtggacagagcggcgagcttctacctcgcgggccgggagttcgaatctctccaggggcac	40	24.8447	loop + mutation	Arg	tct	Arg	TCT	66.1	Arg	77.4
39	gggccggtatcttagtctggtcaaagaagtggacttttaatccgcgcgccgtgggttcgaatcccacccggcccacc	38	23.6025	no	Lys	ttt	Lys	TTT	68.3	Ile2	77	IPD:-19.30
40	gtggtagtagttcagatggaagaacgtcgccttgtgacggcgaaggtcgggggttcgaagcccctctatcaccc	37	22.9814	no	His	gtg	His	GTG	55.8	His	73.1
41	attctggcactggtgggcgagcccaccggcggcagcttcaagctgtcgctggccggagaatcgaccggaaacatcccgttcaacgcgacccagggcc	32	19.8758	NA	SeC	tca	NA	NA	NA	NA	NA
42	gggcctatagctcatctggtagagcgcctgccttgcaagcaggaggcggcaggttcaagtcctgttaggtccac	29	18.0124	mutations	Ala	tgc	Ala	TGC	77.8	Val	82.1	IPD:-0.20
43	gccttcgtagctcagttggtagagctctcgcctcttaagcgagatgtcgcaggttcgacccctgccggaggcac	28	17.3913	mutations	Lys	ctt	Lys	CTT	73.1	Asn	87.1	IPD:-12.00
44	ggtccgttggagtagatggacatctcgccaccctctcaaggtggagatcacgggttcaagtcccgtacggactgc	26	16.1491	mutations	Glu	ctc	Glu	CTC	59.5	Asp	64.8	IPD:-3.20
45	cccgtacatgcccaactggtgtttgggagcaggctgtaaccctgtggccttcgggacggtgaggttcgattcctcagtgcgggacca	26	16.1491	loop + mutatations	Tyr	gta	Tyr	GTA	32.8	Cys	28.1	IPD:-8.00
46	gctgggttagctcagtggtagagcgttcccttggtatgggaaaggcccggggttcaatcccccgactcagctc	24	14.9068	mutations	Thr	ggt	Thr	GGT	62.5	Thr	75.5
47	tggggtgtagttcaatctggcagaacgctcgactgttaatcgagtagttgaaggttcgagtccttccatcccagcca	24	14.9068	mutations	Asn	gtt	Asn	GTT	75.4	Asn	80.4
48	agcggtgtagagcagctaggtagctcgccgggctcataacccggaggacgcgtgttcgattcacgccaccgccac	23	14.2857	mutations	Met	cat	fMet	CAT	70.5	fMet	77
49	tggggtgaagccgatctggaaggcagcggtctccaaagccgtctcatagcgggttcgaatcccgtcacccctgcca	16	9.93789	loop + mutatations	Trp	cca	Trp	CCA	46.4	Ser	46.7	IPD:-22.80,trunc_start:1
50	gcctcggtgacgtaatggaagccgtgctgcactcagactgcagtgtccgaaagggcgtgagggttcgactccctcccgaggtacca	15	9.31677	mutations	Leu	cag	Leu	CAG	61.9	Leu	79.7
51	gcccctgtatcccaacggcagaggaagcggtctgagaggccgttcagtgagggttcgaatccctctgggggcac	14	8.69565	mutations	Leu	gag	Leu	GAG	48.7	Leu	51.1
52	gcgaaggtagctcagctggtagagcgccaccttgccaaggtggaggtcgcgggatcgtaacccgttcttcgctc	14	8.69565	no	Gly	gcc	Gly	GCC	63.3	Gly	75.2
53	gccgcacatgcccaactggtgtttgggagcaggctgtaaccctgtggccttcgggacggtgaggttcgattcctcagtgcggtacca	14	8.69565	loop + mutatations	Tyr	gta	Tyr	GTA	36.7	Cys	34.7	IPD:-8.90
54	ggccctgtagctcagaggaagagcacccgcctgtcgagcgggaggtcgcggtatcgtaatccgtcagggtcgc	14	8.69565	mutations	Asp	gtc	Asp	GTC	49.9	Ile2	52.7	IPD:-22.10
55	gcggttatagctcagcctggccagagcatcacgttgccaacgtgaacgtcgcgggttcaaatcccgctagccgctc	13	8.07453	no	Gly	gcc	Gly	GCC	67.8	Gly	77.4
56	gctgctgtagctcacctggtagagcgtcggcgtcgtatcccgaaggcatccggttcgagtccggacagcagcccc	12	7.45342	loop + mutatations	Thr	cgt	Thr	CGT	53.4	Thr	69.7
57	tgctcgttggtgtaactggcaacactacggactctgactccgtcattcttggttcgaatccagggcgagcaacca	12	7.45342	mutations	Gln	ctg	Gln	CTG	53.4	Gln	69.7
58	tggggtgtccgttaatcaggcaaacgagcggactgttaatccgtccctgcaggttcgaatcctgccaccccagcca	11	6.8323	mutations	Asn	gtt	Asn	GTT	64.7	Gln	67.5	IPD:-68.50
59	cggggtgtagttcagtggaagagcgcttggtttgggaccaagatgtcgcaggttcgaatcctgtcaccccgac	11	6.8323	mutations	Pro	tgg	Pro	TGG	70.3	Pro	86.3
60	gcctctatggtccaacggagatgacgccggtctacggaaccggagatgcgtgttcgattcgcgctaggggcac	10	6.21118	mutations	Arg	acg	Arg	ACG	54.2	Arg	49.8
61	gccgcagtatgcaaaccggaaaagcagccgtactcaaaatgcggtgtgtgcgggttcgagccccgcctgcggtac	10	6.21118	loop + mutatations	Leu	caa	Leu	CAA	56.3	Leu	60.1
62	gctgggttagctcagtggtagagcgttcctctggtatgggaaaggcccggggttcaatcccccgattcagctc	10	6.21118	mutations	Thr	ggt	Thr	GGT	52.9	Val	65	IPD:-7.90
63	gcccttgtagctcagtggcagagcaccgatcttgtaaatcgggttgtcgagcgttcgattcgttcctggggctc	10	6.21118	no	Thr	tgt	Thr	TGT	51.9	Thr	62.8
64	tgctcgttggtgtaactggcaacactacggactctggctccgtcattcttggttcgaatccagggcgagcaacca	9	5.59006	mutations	Gln	ctg	Gln	CTG	50.7	Gln	68.9
65	gctgctgtagctcacctggcagagcgtcggcgtcgtatcccgaaggcatccggttcgagtccggacagcagctc	8	4.96894	loop + mutatations	Thr	cgt	Thr	CGT	53.6	Thr	69.1
66	gcaccatttgctcaatggcagagcggcggcttctaaccccgtgagtgccggttcgattccggcatggtgcacc	8	4.96894	NA	Pyl	cta	Sup	CTA	67.3	Ile	59	IPD:-59.00
67	gccgtcatagctcagttggtagagcactggcctgaaaacccagtggccgaggttcgagtcctcgtgtcggcac	8	4.96894	loop + mutatations	Phe	gaa	Phe	GAA	70.6	Thr	77.3	IPD:-11.70
68	gctactgaggcccatatggatgggcgcggccatggtaaggccgaggtagatgggttcaagtccctccagtagctc	8	4.96894	no	Thr	ggt	Thr	GGT	38.3	Thr	30.4
69	gcaccatttgctcaatggcagagcggcggcttctaactccgtgagtgccggttcgattccggcatggtgcacc	7	4.34783	NA	Pyl	cta	Sup	CTA	65.1	Arg	56.2	IPD:-56.20
70	gccttcgtagctcagtggtagagctgtcgcctcttaagcgataggtcgttggttcaaatccagccgggggcac	6	3.72671	mutations	Lys	ctt	Lys	CTT	68	Asn	78.7	IPD:-10.60
71	gccgtcatagctcagttggtagagcaccggcctgaaaacccggtggccgaggttcgagtcctcgtgtcggcac	6	3.72671	loop + mutatations	Phe	gaa	Phe	GAA	71.8	Thr	78.9	IPD:-12.70
72	ggtcgggtggtctgttggcaggccggtcgggttttcaccccggcgtcatcgcgggttcgattcccgtcccgactgc	6	3.72671	mutations	Glu	ttc	Glu	TTC	45.8	Glu	40.8
73	gccgcagtatgcaaaccggaaaagcagccgtactcaaaatgcggtgcgtgcgggttcgatccccgcctgcggtac	5	3.10559	loop + mutatations	Leu	caa	Leu	CAA	54.4	Leu	58.4
74	gtccgtgtagctcagtggtagagcgcctgctcgacacgcaggaggaccgaggttcgaaacctcgcatggacac	5	3.10559	mutations	Val	gac	Val	GAC	62.4	Thr	74.8	IPD:-6.90
75	cggggtgtagtgaaaaggcatcatgctggttttgggtaccagtggttccggttcgagtccgggctccccgac	5	3.10559	mutations	Pro	tgg	Pro	TGG	43	Trp	44.3	IPD:-3.70
76	gtccgtttagctcagctggaagagcgctcggcccacacccgagaggccgcaggttcgatccctgcaatggacac	4	2.48447	mutations	Val	cac	Val	CAC	62.2	Ile	74.5	IPD:-0.90
77	gctccgctatgcaaactggcaaagcagccgtgttcagagcgcggtgtttctcggttcgaccccgaggcggagtac	4	2.48447	mutations	Leu	cag	Leu	CAG	36.1	Leu	40.8	pseudo
78	aggggtagagccagctgggacggcagcggattccaaacccgccattgacggagttcgattctccgtacccctgcca	4	2.48447	loop + mutatations	Trp	cca	Trp	CCA	43.5	Cys	38.2	IPD:-14.60
79	gtctctgtaggcaaactggcaaagccgccatcttgagggggtggtgcgtgcgggttcgactcccgccagagacac	4	2.48447	mutations	Leu	gag	Leu	GAG	52.7	Leu	61.6
80	gcgaaggtagctcagctggcagagcgccaccttgccaaggtggaggtcgcgggatcgcaacccgttcttcgctc	4	2.48447	no	Gly	gcc	Gly	GCC	61.9	Gly	72.7
81	gctgggttagctcagtggcagagcgttcccttggtatgggaaaggcccggggttcaatcccccgactcagctc	4	2.48447	mutations	Thr	ggt	Thr	GGT	61.1	Thr	73
82	gctgggttagctcagtggtagagcgttccctcggtacgggaaaggcccggggttcaatcccccgactcagctc	4	2.48447	mutations	Thr	ggt	Thr	GGT	57.8	Thr	72.8
83	tggggtgtagttcaactggaagaacgctcgactgttaatcgagtagttgaaggttcgagtccttccactccagc	4	2.48447	mutations	Asn	gtt	Asn	GTT	69	Arg	73.5	IPD:-1.40
84	gtcctcgctgacggactctgccctggccctccggaggccgggtgggtggttcgactccacccggggacac	4	2.48447	NA	Arg	ccg	NA	NA	NA	NA	NA
85	gtcctcgctgacggactctgccctggccctccggaggccgggtgggtggttcgattccacccggggacac	4	2.48447	NA	Arg	ccg	NA	NA	NA	NA	NA
86	gcgggtgtggccgaatggctcaggcaccagacttccactctggctaagcaggttcgattcctgtcatccgctc	4	2.48447	mutations	Gly	tcc	Gly	TCC	58.4	Cys	67.1	IPD:-22.10
87	ggggcgttggtgaacgtggttatcactcttggcttttacccttgaataccgggatcgagacccggacgccccac	4	2.48447	no	Lys	ttt	Lys	TTT	30.6	Glu	27.9	IPD:-13.00
88	gctgctgtagctcacctggcagagcgtcggcgtcgtatcccgaaggtatccggttcgagtccggacagcagcccc	3	1.86335	loop + mutatations	Thr	cgt	Thr	CGT	52.1	Thr	71
89	gctgctgtagctcacctggtagagcgtcggcgtcgtatcccgaaggcatccggttcaagtccggacagcagctc	3	1.86335	loop + mutatations	Thr	cgt	Thr	CGT	53.1	Thr	70.9
90	gcaccatttgctcaatggcagagcggcggcttctaaaaccgtgagtgtcggttcgactccggcatggtgcacc	3	1.86335	NA	Pyl	cta	Sup	CTA	62	Phe	60.5	IPD:-60.50
91	ggagggtgagcatcaggtgatgcagcgagattgctaatcccgtacggcaaccaccccgtgaggttcgaatcctcctccctccgc	3	1.86335	mutations	Ser	gct	Ser	GCT	23.5	Ser	29.3
92	ccgggtaagccatgctggttatgtgcagtcagactgtaaatctgatgtcttcggacttcgggggttcgattccctctacccggac	3	1.86335	loop + mutatations	Tyr	gta	Tyr	GTA	44.2	Tyr	50.3
93	ggagggtgagcatctggtgatgcaggggtcctgctaaggccctacggattcatacccgtgagtttcgattactcctccctccgc	3	1.86335	NA	Ser	gct	NA	NA	NA	NA	NA
94	gcgggtgtggccgaatggctcaggcaccagacttccattctggctacgcaggttcgattcctgtcatccgctc	3	1.86335	mutations	Gly	tcc	Gly	TCC	63.1	Cys	66.2	IPD:-17.30
95	gcccttgtagctcagtggcagagcaccgaccttgtaagtcgggttgtcccgggttcgattcctggtaggggctc	3	1.86335	no	Thr	tgt	Thr	TGT	61.9	Thr	71
96	gccgtggtaggccatctggcgagccgccgagttcaagtctcggtgtttgcgggttcgaatcccgcccacggtac	2	1.24224	loop + mutatations	Leu	caa	Leu	CAA	53.4	Arg	50.2	IPD:-0.70
97	gctccgctatgcaaactggcaaagcagccgtgttcagagcgcggtgtttctcggttcgaccccgaggcggagtgc	2	1.24224	mutations	Leu	cag	Leu	CAG	35.4	Glu	39.2	pseudo,IPD:-2.70
98	gctgctgtagctcacctggcagagcgtcggcgtcgtatcccgaaggcatccggttcgagtccggacaagcagcccc	2	1.24224	loop + mutatations	Thr	cgt	Thr	CGT	43.6	Thr	48.2
99	gctgctgtagctcacctggtagagcgtcggcgtcgtatcccgaaggcatccggttcgagtccggacagcagctc	2	1.24224	loop + mutatations	Thr	cgt	Thr	CGT	55	Thr	71.6
100	gccgtcatagctcagttggtagagcactggcctgaaaacccagttgccgaggttcgattcctcgtgtcggcac	2	1.24224	loop + mutatations	Phe	gaa	Phe	GAA	67.5	Thr	73.7	IPD:-4.20
101	gtctctgtaggcaaattggaaaagccgccatcttgagggggtggtgcgtgcgggttcgactcccgccagagacac	2	1.24224	mutations	Leu	gag	Leu	GAG	52	Leu	61.5
102	ccgggtaagccatgttggttatggcaggcagactgtaaatctgtcgtcttcggacttcgggggttcgattccctctacccggacca	2	1.24224	loop + mutatations	Tyr	gta	Tyr	GTA	58.8	Tyr	57.4
103	tggggtgtagttcaactggcagaacgctcgactgttaatcgagtagttgaaggttcgagtccttccactccagc	2	1.24224	mutations	Asn	gtt	Asn	GTT	70.7	Asn	79.6
104	gcccttgtagctcagtggacagagcggcgagcttctacctcgcgggccgagagttcgaatctctccaggggcac	2	1.24224	loop + mutation	Arg	tct	Arg	TCT	67.3	Arg	75.7
105	gggcctatagctcatctggcagagcgcctgccttgcaagcaggaggcggcaggttcaagtcctgttaggtccac	2	1.24224	mutations	Ala	tgc	Ala	TGC	76.4	Ala	81.5
106	tggggtatggtggcaatctggcagtcccgccggactttgactccggaggtgcaggttcgagccctgctaccccatc	2	1.24224	mutations	Gln	ttg	Gln	TTG	53	Gln	64.3
107	gggccggtatcttagtctggtcaaagaagcggacttttaatccgcgcgccgtgggttcgaatcccacccggcccac	2	1.24224	no	Lys	ttt	Lys	TTT	72.6	Ile2	84.1	IPD:-20.50
108	gggccggtatcttagtctggtcaaagaagcggacttttaatccgcgcgccgtgggttcgaatcccacccggcccacc	2	1.24224	no	Lys	ttt	Lys	TTT	72.6	Ile2	84.1	IPD:-20.50
109	gcctctatggtccaacggagatgacgccggtctacggaaccggagatgcgtgttcgactcgcgctaggggcac	1	0.621118	mutations	Arg	acg	Arg	ACG	53.1	Arg	49.4
110	gcctctatggtccaacggatatgacgccggtctacgaaaccggagatgcgtgttcgattcgcgctaggggcac	1	0.621118	mutations	Arg	acg	Arg	ACG	56.9	Arg	54.4
111	gccgtggtaggccatctggcgagccgccgaattcaagtttcggtgtttgcgggttcgaatcccgcccacggtac	1	0.621118	loop + mutatations	Leu	caa	Leu	CAA	54	Leu	51.9
112	ggaccggtaggcgaattggcatagcctgcgtactcaaaatgcgtgttgtttgtgggttcgagtcccacccggtctac	1	0.621118	loop + mutatations	Leu	caa	Leu	CAA	51.6	Leu	55.6
113	gtccgtttagctcaactggaagagcgctcggtccacacccgagaggccgcaggttcgatccctgcaatggacac	1	0.621118	mutations	Val	cac	Val	CAC	60	Ile	72.4	IPD:-1.60
114	agcggtgtagagcagctaggaggtagctcgccgggctcatgacccggaggacgcgtgttcgattcacgccaccgccac	1	0.621118	mutations	Met	cat	Met	CAT	64.8	Pro	63	IPD:-8.40
115	agcggtgtagagcagctaggtagctcgccgggctcatgactcggaggacgcgtgttcgattcacgccaccgccac	1	0.621118	mutations	Met	cat	Met	CAT	64	Pro	68.4	IPD:-15.00
116	gcctcactagctcattggtagagccgctcgctcataacgtgcaggcacctggttcgattccagggtgaggtac	1	0.621118	mutations	Met	cat	Ile2	CAT	50.9	Lys	61.5	IPD:-1.10
117	gcctcgctagctcattggtagagccgctcgctcataacgtgcaggtacctggttcgattccagggtgaggtac	1	0.621118	mutations	Met	cat	Ile2	CAT	46.2	Ile2	61.8
118	tggggtgaagccgatccggaaggcagcggtctccaaagccgtctcatagcgggttcgaatcccgtcacccctgcca	1	0.621118	loop + mutatations	Trp	cca	Trp	CCA	43.7	Ser	46.5	IPD:-26.30,trunc_start:1
119	gcctctgtagctcaacggacagagcaacgcggtcctaacgcgcggtggctggaggttcgaatcctctcggaggcac	1	0.621118	mutations	Arg	cct	Arg	CCT	55.9	Arg	61.1
120	gctgctgtagctcacctggcagagcgttggcgtcgtatcccgaaggcatccggttcgagtccggacagcagcccc	1	0.621118	loop + mutatations	Thr	cgt	Thr	CGT	47.8	Thr	63.2
121	gcaccatttgctcaatggcagagcggcggcttctaaaaccgtgagtgccggttcgattccggcatggtgcacc	1	0.621118	NA	Pyl	cta	Sup	CTA	66.6	Phe	65.5	IPD:-65.50
122	gcaccatttgctcaatggcagagcggcggcttctaaccccgtgagtgccggttcgattccggcatggtgcac	1	0.621118	NA	Pyl	cta	Sup	CTA	67.3	Ile	59	IPD:-59.00
123	gctcccatggggtagtggtaaccctcctggttctcagccaggcatcccgagttcgatcctcggtgggagtgc	1	0.621118	mutations	Glu	ctc	Glu	CTC	48.2	Gln	59.7	IPD:-2.90
124	tgctcgttggtgtaactggcaacactacggactctgactccgtcattcttggttcgaatccaggacgagcaacca	1	0.621118	mutations	Gln	ctg	Gln	CTG	59.3	Gln	74.9
125	tgctcgttggtgtaactggcaacactacggactctgactccgtcattcttggttcgaatccagggcgagcagcca	1	0.621118	mutations	Gln	ctg	Gln	CTG	52.7	Gln	71.4
126	cgccttcgtagctcagtggtagagctgtcgcctcttaagcgataggtcgttggttcgaatccagccggggcac	1	0.621118	mutations	Lys	ctt	Lys	CTT	60.6	Asn	71.8	IPD:-7.00
127	gccttcgtagctcagcggtagagctgtcgcctcttaagcgataggtcgttggttcgaatccagccgggggcac	1	0.621118	mutations	Lys	ctt	Lys	CTT	68.9	Asn	82.6	IPD:-12.20
128	gccttcgtagctcagtggtagagctgccgcctcttaagcggtaggtcgttggttcgaatccagccgggggcac	1	0.621118	mutations	Lys	ctt	Lys	CTT	71.2	Asn	84.1	IPD:-12.40
129	gccttcgtagctcagttggtagagctctcgcctcttaagtgagatgtcgcaggttcgacccctgccggaggcac	1	0.621118	mutations	Lys	ctt	Lys	CTT	69.4	Phe	79.3	IPD:-5.60
130	gggtccgtagctgagatggattagcacccgactcttaatcgggggacgtgggatcgttacctaccgggcctac	1	0.621118	mutations	Lys	ctt	Lys	CTT	39.2	Phe	43.6	IPD:-4.90
131	gccgtcatagctcaattggtagagcactggcctgaaaacccagtggccgaggttcgattcctcgtgtcggcac	1	0.621118	loop + mutatations	Phe	gaa	Phe	GAA	69.2	Thr	76.6	IPD:-12.90
132	gccgtcatagctcagttggtagagcaccggcctgaaaacccagtggccgaggttcgattcctcgtgtcggcac	1	0.621118	loop + mutatations	Phe	gaa	Phe	GAA	62	Thr	74.2	IPD:-14.20
133	gccgtcatagctcagttggtagagcactggcctgaaaacccggtggccgaggttcgagtcctcgtgtcggcac	1	0.621118	loop + mutatations	Phe	gaa	Phe	GAA	67.6	Thr	75	IPD:-14.50
134	agcccctgtatcccaacggcagaggaagcggtctgagaggccgttcagtgagggttcgaatccctctggggcac	1	0.621118	mutations	Leu	gag	Leu	GAG	35.1	Leu	44.3
135	gtctctgtaggcaaaccggaaaagccgccatcttgagggggtggtgcgtgcgggttcgactcccgccagagacac	1	0.621118	mutations	Leu	gag	Leu	GAG	49.1	Leu	56.2
136	gtctctgtaggcaaactggcaaagccgccatcttgagggggtggtgcgtacgggttcgactcccgtcagagacac	1	0.621118	mutations	Leu	gag	Leu	GAG	50.5	Leu	59.1
137	gtctctgtaggcaaactggcaaagccgccatcttgagggggtggtgcgtgcgggttcggctcccgccagagacac	1	0.621118	mutations	Leu	gag	Leu	GAG	45.1	Leu	56.4
138	gcgcctttggcggaatggctacgtgctcggctgcaacccgagtcatcccggttcgactccgggagggcgctc	1	0.621118	mutations	Cys	gca	Cys	GCA	51.9	Cys	64.8
139	gcgcctttggcggaatggctacgtgctcggctgcaacccgagttatcccggttcgactccaggagggcgctc	1	0.621118	mutations	Cys	gca	Cys	GCA	43.9	Cys	53.4
140	gcgaaggtagctcagcctggccagagcatcacgttgccaaggtggaggtcgcgggatcgtaacccgttcttcgctc	1	0.621118	no	Gly	gcc	Gly	GCC	45.4	Gly	42.7
141	gcgaaggtagctcagctgacagagcgccaccttgccaaggtggaggtcgcgggatcgtaacccgttcttcgctc	1	0.621118	no	Gly	gcc	Gly	GCC	54.6	Gly	65.7
142	gcgaaggtagctcagctggcagagcgccaccttgccaaggtgggggtcgcgggatcgtaacccgttcttcgctc	1	0.621118	no	Gly	gcc	Gly	GCC	61.3	Gly	73.8
143	gctgatttagctcagtggtagagcgccgacttggtatgtcggaggccccgggttcgatccccggattcagctc	1	0.621118	mutations	Thr	ggt	Thr	GGT	62	Thr	77.6
144	gctggaagagcgctcggtccagagcgttcctctggtatgggaaaggcccggggttcaatcccctgactcagctc	1	0.621118	mutations	Thr	ggt	Thr	GGT	17.4	Phe	17.7	pseudo,IPD:-17.70
145	aaccgggtaagccatgttggttatggcaggcagactgtaaatctgtcgtcttcggacttcgggggttcgattccctccaggccc	1	0.621118	loop + mutatations	Tyr	gta	Tyr	GTA	40.1	Tyr	50.2
146	cccgtacatgcccaactggtgtttgggagcaggctgtaaccctgtggccttcgggacggtgaggttcgattcctcagtgcgggac	1	0.621118	loop + mutatations	Tyr	gta	Tyr	GTA	26	Cys	21.2	pseudo,IPD:-4.70
147	ccgggtaagccatgttggttatggcaggcagactgtaaatctgtcgtcttcggacttcgggggttcgattccctctacccggac	1	0.621118	loop + mutatations	Tyr	gta	Tyr	GTA	52	Tyr	53.4
148	gccgcacatgcccaactggtgttgggagcagactgtaaatctgtggccctagggacggtgaggttcgattcctcagtgcggtacca	1	0.621118	loop + mutatations	Tyr	gta	Tyr	GTA	42.4	Cys	40.8	IPD:-14.40
149	gccgcacatgcccaactggtgtttgggagcaggctgtaaccctgtggcctccgggacggtgaggttcgattcctcagtgcggtacca	1	0.621118	loop + mutatations	Tyr	gta	Tyr	GTA	37.8	Cys	34.7	IPD:-9.70
150	gccgcacatgcccaactggtgtttgggagcaggctgtaaccctgtggcctcgggacggtgaggttcgattcctcagtgcggtacca	1	0.621118	loop + mutatations	Tyr	gta	Tyr	GTA	38.4	Cys	34.7	IPD:-13.00
151	ggccctgtagctcagaggaagagcgccgatctgtcgaatcggaggtcgcggtatcgtaatccgtcagggtcgc	1	0.621118	mutations	Asp	gtc	Asp	GTC	43.1	Ile2	47.7	IPD:-28.30
152	ggccctgtggagcagctaggagtgctcgccaccctgtcacggtggaggtcgacggttcaaatccgttcagggtcgc	1	0.621118	mutations	Asp	gtc	Asp	GTC	62.3	Asp	66.6
153	gtggccgtagttcagccggtagaacgctgggtcgtgatcccagtcgtcgagggttcgagtccctccggtcaccc	1	0.621118	no	His	gtg	His	GTG	58.1	His	82.8
154	gtggccgtagttcagcggtagaacaccgggttgtgatcccggacgccgtcggttcgaatccgaccggtcaccc	1	0.621118	no	His	gtg	His	GTG	65.8	His	84
155	tggggtgtccgttaatcaggcaaacgagcggactgttaatccgcccctgcaggttcgaatcctgccaccccagc	1	0.621118	mutations	Asn	gtt	Asn	GTT	57.5	Gln	68.8	IPD:-70.90
156	gcctgttagcggactggtcgtccgatccaagctgataacttggcgtaagcggtgttcgattcaccgagcaggtacca	1	0.621118	NA	Ile	gat	NA	NA	NA	NA	NA
157	ggagggtgagcatcaggtgatgcagcgagattgctaatcccgtacggtaaccaccccgtgaggttcgaatcctcctccccccgc	1	0.621118	NA	Ser	gct	NA	NA	NA	NA	NA
158	gcgaaggtagctcagctggcagagcgtatgatgccaatgtggaggtcgcgggatcgtaacccgttcttcgctc	1	0.621118	NA	Gly	gcc	Undet	NNN	32.9	Val	32.9	pseudo
159	gcccttgtagctcagtggacagagcggcgagcttctatctcgcgggccgggagttcgaatctctccaggggcacca	1	0.621118	loop + mutation	Arg	tct	Arg	TCT	71.8	Arg	84.4
160	gggcctgtagctccaactggtagagcagcatccttgcaagatgacggctgtcggttcgaatccgacctggtccac	1	0.621118	mutations	Ala	tgc	Ala	TGC	57	Arg	58.9	IPD:-17.70
161	gcccttgtagctcagtggtagagcaccgaccttgtaagtcgggttgtcccgggttcgattcctggttggggccc	1	0.621118	no	Thr	tgt	Thr	TGT	55.8	Thr	68.1
162	ggtcgggtggtctgttggcaggccggtcgggttttcaccccggacattcgcgggttcaattcccgtcccgatcgc	1	0.621118	mutations	Glu	ttc	Glu	TTC	45.5	Glu	37.1
163	tggggtatggtggcaatccggcagtcccgccggactttgactccggaggtgcaggttcgagtcctgctaccccatc	1	0.621118	mutations	Gln	ttg	Gln	TTG	56.4	Gln	66.5
164	tggggtatggtggcaatctggcagtcccgccggactttgactccggaggtgcagattcgagtcctgctaccccatc	1	0.621118	mutations	Gln	ttg	Gln	TTG	44.9	Gln	58.8
165	tggggtatggtggcaatctggcagtcccgccggactttgactccggaggtgcaggttcgagtcttgctaccccatc	1	0.621118	mutations	Gln	ttg	Gln	TTG	45.8	Gln	53.3
166	tggggtgtggtggcaatctggcagtcccgccggactttgactccggaggtgcaggttcgagccctgctaccccatc	1	0.621118	mutations	Gln	ttg	Gln	TTG	52.5	Gln	57
167	tggggtgtggtggcaatctggcagtcccgccggactttgactccggaggtgcaggttcgagtcctgctaccccatc	1	0.621118	mutations	Gln	ttg	Gln	TTG	56	Gln	59.2

## Sheet: Supplementary File 1b
Supplementary File 1b. Overview of anticodons encoded by C1 mycobacteriophages compared to their hosts'
Anticodon	Codon	Amino acid	tRNAs carried by the host	tRNA carried by the phages	Only encoded by the host	Only encoded by the phage	Encoded by both host and phage	Cleaved in anticodon by RelE	Cleaved in anticodon by VapC	Not encoded by the phage and not cleaved	Prefered codon by the phage	Prefered codon by the host	Codon fraction by the phage	Codon fraction by the host	Codon frequency by the phage	Codon frequency by the host
TAA	TTA	L	Yes	Yes			Yes						0.003	0.001	0.319	0.106
TAT	ATA	I	Yes		Yes					Yes			0.02	0.012	0.871	0.531
TAG	CTA	L	Yes		Yes					Yes			0.011	0.017	1.027	1.253
TCT	AGA	R	Yes		Yes					Yes			0.017	0.018	1.233	1.232
TAC	GTA	V	Yes		Yes					Yes			0.026	0.029	2.333	2.081
TGA	TCA	S	Yes		Yes				Yes				0.056	0.031	2.989	1.72
AAG	CTT	L											0.035	0.033	3.416	2.505
TGT	ACA	T	Yes	Yes			Yes						0.068	0.042	4.213	2.739
CCT	AGG	R	Yes	Yes			Yes						0.043	0.046	3.212	3.164
TGG	CCA	P	Yes	Yes			Yes						0.057	0.048	3.281	2.781
AAC	GTT	V											0.045	0.051	3.94	3.631
AGA	TCT	S											0.026	0.052	1.391	2.824
TTT	AAA	K	Yes		Yes				Yes				0.181	0.056	3.896	2.081
CAA	TTG	L	Yes	Yes			Yes						0.094	0.057	9.12	4.331
TTG	CAA	Q	Yes	Yes			Yes						0.143	0.057	4.166	2.336
ACT	AGT	S											0.052	0.064	2.784	3.503
TCG	CGA	R	Yes		Yes					Yes			0.066	0.066	4.925	4.501
TGC	GCA	A	Yes	Yes			Yes						0.092	0.073	11.868	7.071
AGT	ACT	T											0.031	0.074	1.922	4.777
AGG	CCT	P											0.052	0.088	3.021	5.032
AAT	ATT	I											0.043	0.095	1.847	4.077
AAA	TTT	F											0.051	0.096	1.551	2.951
AGC	GCT	A											0.041	0.097	5.251	9.491
TCC	GGA	G	Yes	Yes			Yes						0.099	0.103	8.744	8.323
ATT	AAT	N											0.115	0.117	2.52	3.907
CCC	GGG	G	Yes		Yes					Yes			0.17	0.129	14.976	10.383
ATA	TAT	Y											0.149	0.138	3.119	4.183
ATC	GAT	D											0.199	0.147	12.383	10.383
TTA	TAA	*	Yes		Yes			Yes		Yes			0.068	0.15	0.23	0.701
TTC	GAA	E	Yes	Yes			Yes						0.294	0.15	15.594	9.427
ACG	CGT	R	Yes	Yes			Yes						0.126	0.162	9.401	11.041
ACC	GGT	G		Yes		Yes							0.191	0.166	16.765	13.377
CTA	TAG	*	Yes		Yes			Yes					0.203	0.168	0.692	0.786
CGT	ACG	T	Yes	Yes			Yes						0.317	0.171	19.581	11.084
ACA	TGT	C											0.195	0.205	1.687	1.699
ATG	CAT	H	Yes		Yes					Yes			0.187	0.209	4.279	5.138
GGA	TCC	S	Yes		Yes				Yes				0.215	0.236	11.471	12.931
CGC	GCG	A	Yes	Yes			Yes				Yes		0.416	0.256	53.546	24.949
CCG	CGG	R	Yes		Yes					Yes			0.267	0.273	19.893	18.685
GAG	CTC	L	Yes	Yes			Yes						0.308	0.277	29.757	20.936
CGA	TCG	S	Yes		Yes			Yes	Yes		Yes	Yes	0.402	0.301	21.434	16.477
GGG	CCC	P	Yes		Yes					Yes			0.348	0.311	20.176	17.857
GCT	AGC	S	Yes	Yes			Yes					Yes	0.248	0.316	13.193	17.305
CAC	GTG	V	Yes	Yes			Yes				Yes		0.489	0.374	43.229	26.859
GCG	CGC	R	Yes		Yes					Yes	Yes	Yes	0.482	0.435	35.972	29.726
GAC	GTC	V	Yes	Yes			Yes				Yes	Yes	0.44	0.546	38.912	39.174
CGG	CCG	P	Yes		Yes					Yes	Yes	Yes	0.543	0.553	31.417	31.743
GGC	GCC	A	Yes		Yes					Yes	Yes	Yes	0.451	0.574	57.937	55.906
GCC	GGC	G	Yes	Yes			Yes				Yes	Yes	0.54	0.602	47.477	48.474
CAG	CTG	L	Yes	Yes			Yes				Yes	Yes	0.549	0.615	53.061	46.457
TCA	TGA	*	Yes	Yes			Yes				Yes	Yes	0.729	0.682	2.482	3.185
GGT	ACC	T	Yes	Yes			Yes				Yes	Yes	0.583	0.713	35.96	46.181
GTG	CAC	H	Yes	Yes			Yes				Yes	Yes	0.813	0.791	18.565	19.449
GCA	TGC	C	Yes	Yes			Yes				Yes	Yes	0.805	0.795	6.966	6.603
CTC	GAG	E	Yes	Yes			Yes				Yes	Yes	0.706	0.85	37.481	53.57
GTC	GAC	D	Yes		Yes					Yes	Yes	Yes	0.801	0.853	49.925	60.068
GTA	TAC	Y	Yes		Yes					Yes	Yes	Yes	0.851	0.862	17.831	26.031
GTT	AAC	N	Yes	Yes			Yes				Yes	Yes	0.885	0.883	19.454	29.62
GAT	ATC	I	Yes	Yes			Yes				Yes	Yes	0.936	0.892	40.057	38.134
GAA	TTC	F	Yes		Yes					Yes	Yes	Yes	0.949	0.904	28.975	27.857
CTG	CAG	Q	Yes	Yes			Yes	Yes			Yes	Yes	0.857	0.943	24.869	38.771
CTT	AAG	K	Yes	Yes			Yes				Yes	Yes	0.819	0.944	17.574	35.268
CAT	ATG	M	Yes	Yes			Yes				Yes	Yes	1	1	18.92	23.568
CCA	TGG	W	Yes	Yes			Yes				Yes	Yes	1	1	14.917	19.067

## Sheet: Supplementary File 1c
Supplementary File 1c. Analysis of anticodon loop mutations and anticodon avoidance in other species
Species	Result summary	In agreement with Mycobacterium	Anticodon nuclease	tRNA target	Cleavage site	Representative phage tRNA	Source
L. interrogans	The known phages do not encode tRNAs	NA	VapC-L.interrogans	tRNA fMet (cat)	unknown (likely same as VapCLT2 and VapC (MvpT))	NA	Lopes et al. (2014)
Shigella flexneri	Shigella phages do not encode tRNA fMet (the target). Possible anticodon avoidance.	Yes	VapCLT2	tRNA fMet (cat)	between+38and+39, at the anticodon stem-loop boundary	NA	Winther & Gerdes (2011)
E. Coli	Mutated in the cleavage site	Yes	VapC	tRNA fMet (cat)	between+38and+39, at the anticodon stem-loop boundary	tgcgggttagatctctggtagagatcgctagtctcataagctagaaagaggtaggttcgattcctgcacccgcttcca	Winther & Gerdes (2011)
S. entericaserovar subsp. Typhimurium LT2	Mutated in the cleavage site	Yes	VapC (MvpT)	tRNA fMet (cat)	between+38and+39, at the anticodon stem-loop boundary	tgcgggttagatctctggtagagatcgctagtctcataagctagaaagaggtaggttcgattcctgcacccgcttcca	Winther & Gerdes (2011)
E. Coli	No mutation, but all tRNA lys encoding phages also encode rnl1 and rnl2	No, but tRNA cleavage repair mechanism present	PrrC/RloC	tRNA Lys (ttt)	cleavage junction is 5' to the wobble position (CU-UUUAA)	ggaagtgtagcagaatggtgatgcggcagacttttaatctgacaggcgatgggttcgaatccctccacttctacca	Amitsur et al. (1987)
E. Coli	Mutated in the cleavage site	Yes	colicin (D)	tRNA Arg (acg)	Colicin D cleaves all four of these tRNAs between positions 38 and 39 at the 3′ end of the anticodon-loop	gcaggattagttcaaatggatagagcaacagtctacgaagctgttaataggggttcgaatcccttatcctgcgcca	Ogawa (2015)
E. Coli	E.coli phages do not encode tRNA Arg (ccg)	NA	colicin (D)	tRNA Arg (ccg)	Colicin D cleaves all four of these tRNAs between positions 38 and 39 at the 3′ end of the anticodon-loop	NA	Ogawa (2015)
E. Coli	Mutated in the cleavage site	Yes	colicin (D)	tRNA Arg (tct)	Colicin D cleaves all four of these tRNAs between positions 38 and 39 at the 3′ end of the anticodon-loop	cgaggcatagctcagaaggaagagcaaggaccttctaagtcctgggtcgtaggttcgatccctactgcctcgacca	Ogawa (2015)
E. Coli	Mutated in the cleavage site. Rarely encoded	Yes	colicin (D)	tRNA Arg (cct)	Colicin D cleaves all four of these tRNAs between positions 38 and 39 at the 3′ end of the anticodon-loop	gttctgctggcgtaacaggataacgcaaagacctcctaagtcttagttgctggttcgagtccagcgcggaacacca	Ogawa (2015)
E. Coli	Targets the anticodon itself, mutations in the anticodon loop. Might also be explained by modification absence.	Yes, but modifications might effect this observation	colicin (E5)	tRNA His (gtg)	QU sequences conserved in these Q-containing tRNAs cleaves in anticodon loop	gtggccttatcataaatggtaatgacccatgctgtgaacatggtctatacgggttcaaatcccgtaggtcacccca	Ogawa (2015)
E. Coli	Targets the anticodon itself, mutations in the anticodon loop. Might also be explained by modification absence.	Yes, but modifications might effect this observation	colicin (E5)	tRNA Asn (gtt)	QU sequences conserved in these Q-containing tRNAs cleaves in anticodon loop	ggatgtgtagctcaatggcagagcgatcgcctgttaagcgattggttataggttcgaatcctatcacgtccgcca	Ogawa (2015)
E. Coli	Targets the anticodon itself, mutations in the anticodon loop. Might also be explained by modification absence.	Yes, but modifications might effect this observation	colicin (E5)	tRNA Asp (gtc)	QU sequences conserved in these Q-containing tRNAs cleaves in anticodon loop	gcgaccggggctggcttggtaatggtactcccctgtcacgggagggaatgtgggttcaaatcccatcggtcgcgcca	Ogawa (2015)
E. Coli	Targets the anticodon itself, no mutations in the anticodon loop. Might be explained by modification absence.	No, but modifications might effect this observation	colicin (E5)	tRNA Tyr (gta)	QU sequences conserved in these Q-containing tRNAs cleaves in anticodon loop	gtgtcgttatcccgtagatggtagcggtggggactgtaaatcccttgtcattgagactcggtaggttcgactcctacacggcacacca	Ogawa (2015)
D. radiodurans	No known phages for D. radiodurans	NA	MazF	tRNA Val	4-nt motif UACA (but seems not only specific to tRNAs)	NA	Miyamoto et al. (2016)
Geobacillus kaustophilus	The known phages do not encode tRNAs	NA	RloC	multiple tRNAs	α-helical region interrupted by a central loop containing the conserved CXXC sequence	NA	Davidov & Kaufmann (2008)
